# Supplementary material
Source: HighWire-hosted journal article supplement (https://bmjopen.bmj.com/content/11/8/e051588)
Supplement: inline-supplementary-material-1 [file inline-supplementary-material-1.pdf]

## Supplement

eTable 1 Medical Codes of Outcome Measures (ARDS/respiratory failure or IMV)

| Criterion Name                  | Code Type           | Code    |
|---------------------------------|---------------------|---------|
| ARDS                            | ICD-10-CM diagnosis | J80     |
| respiratory failure             | ICD-10-CM diagnosis | J96.0   |
| respiratory failure             | ICD-10-CM diagnosis | J96.01  |
| respiratory failure             | ICD-10-CM diagnosis | J96.02  |
| respiratory failure             | ICD-10-CM diagnosis | J96.20  |
| respiratory failure             | ICD-10-CM diagnosis | J96.21  |
| respiratory failure             | ICD-10-CM diagnosis | J96.22  |
| Invasive Mechanical Ventilation | ICD-10-CM Diagnosis | Z99.12  |
| Invasive Mechanical Ventilation | ICD-10-CM Diagnosis | Z99.11  |
| Invasive Mechanical Ventilation | ICD-9-CM Diagnosis  | V46.1   |
| Invasive Mechanical Ventilation | ICD-9-CM Diagnosis  | V46.11  |
| Invasive Mechanical Ventilation | ICD-10-PCS          | 5A1955Z |
| Invasive Mechanical Ventilation | ICD-10-CM Procedure | 5A1945Z |
| Invasive Mechanical Ventilation | ICD-10-CM Procedure | 5A1935Z |
| Invasive Mechanical Ventilation | ICD-10-CM Procedure | 0BH18EZ |
| Invasive Mechanical Ventilation | ICD-10-CM Procedure | 0BH17EZ |
| Invasive Mechanical Ventilation | ICD-10-CM Procedure | 0BH13EZ |
| Invasive Mechanical Ventilation | ICD-10-CM Procedure | 0B21XEZ |
| Invasive Mechanical Ventilation | CPT                 | 99504   |
| Invasive Mechanical Ventilation | CPT                 | 94004   |
| Invasive Mechanical Ventilation | CPT                 | 94003   |
| Invasive Mechanical Ventilation | CPT                 | 94002   |
| Invasive Mechanical Ventilation | CPT                 | 31730   |
| Invasive Mechanical Ventilation | CPT                 | 31502   |
| Invasive Mechanical Ventilation | CPT                 | 31500   |
| Invasive Mechanical Ventilation | ICD-9-CM Procedure  | 97.23   |
| Invasive Mechanical Ventilation | ICD-9-CM Procedure  | 96.72   |
| Invasive Mechanical Ventilation | ICD-9-CM Procedure  | 96.71   |
| Invasive Mechanical Ventilation | ICD-9-CM Procedure  | 96.70   |
| Invasive Mechanical Ventilation | ICD-9-CM Procedure  | 96.7    |
| Invasive Mechanical Ventilation | ICD-9-CM Procedure  | 96.05   |
| Invasive Mechanical Ventilation | ICD-9-CM Procedure  | 96.04   |
| Invasive Mechanical Ventilation | ICD-10-CM Diagnosis | Z99.1   |

eTable 2. Baseline Characteristics of US Hospitalized Adult COVID-19 Patients by Gender – Overall Cohort

| Characteristic                                | Patient, No. (%) |                   |                     |
|-----------------------------------------------|------------------|-------------------|---------------------|
|                                               | All<br>(n=67456) | Male<br>(n=34518) | Female<br>(n=32938) |
| <b>Age, Mean[SD], y</b>                       | 58.3(17.3)       | 58.8(16.4)        | 57.6(18.1)          |
| <b>Race</b>                                   |                  |                   |                     |
| White                                         | 56.1             | 57.6              | 54.6                |
| Black or African American                     | 23.7             | 21.3              | 26.1                |
| Asian                                         | 3.2              | 3.3               | 3.1                 |
| American Indian or Alaska Native              | 0.6              | 0.5               | 0.6                 |
| Native Hawaiian or Other Pacific Islander     | 0.3              | 0.3               | 0.3                 |
| Unknown                                       | 16.1             | 16.9              | 15.3                |
| <b>Ethnicity</b>                              |                  |                   |                     |
| Hispanic                                      | 16.2             | 16.9              | 15.5                |
| <b>Site of diagnosis at inpatient setting</b> | 85.3             | 86.5              | 84.1                |
| <b>Mode of diagnosis</b>                      |                  |                   |                     |
| Both                                          | 48.0             | 48.2              | 47.9                |
| Clinical                                      | 41.8             | 42.2              | 41.4                |
| Lab                                           | 10.2             | 9.7               | 10.7                |
| <b>Month of index</b>                         |                  |                   |                     |
| February, 2020                                | 1.2              | 1.4               | 1.1                 |
| March, 2020                                   | 6.7              | 7.1               | 6.3                 |
| April, 2020                                   | 11.1             | 11.4              | 10.7                |
| May, 2020                                     | 7.3              | 7.2               | 7.3                 |
| June, 2020                                    | 7.8              | 7.7               | 7.8                 |
| Jul, 2020                                     | 11.1             | 10.9              | 11.3                |
| August, 2020                                  | 6.5              | 6.2               | 6.8                 |
| September, 2020                               | 5.3              | 5.1               | 5.4                 |
| October, 2020                                 | 8.5              | 8.4               | 8.6                 |
| November, 2020                                | 15.9             | 15.6              | 16.1                |
| December, 2020                                | 17.7             | 17.8              | 17.6                |
| January, 2021                                 | 1.0              | 1.1               | 1.0                 |
| <b>US Census division</b>                     |                  |                   |                     |
| Midwest                                       | 15.59            | 15.5              | 15.7                |
| Northeast                                     | 13.10            | 13.2              | 13.0                |
| South                                         | 45.44            | 44.1              | 46.8                |
| West                                          | 3.95             | 4.1               | 3.8                 |
| <b>Baseline Comorbidities</b>                 |                  |                   |                     |
| <b>Gastrointestinal disorders</b>             | 27.3             | 24.7              | 30.0                |
| <b>Skin disorder</b>                          | 13.7             | 12.9              | 14.6                |
| <b>Cancer</b>                                 | 7.9              | 8.3               | 7.6                 |
| Solid tumors                                  | 6.0              | 6.2               | 5.8                 |
| Hematologic malignancies                      | 2.7              | 2.9               | 2.5                 |
| <b>Cardiovascular disease</b>                 | 46.5             | 48.1              | 44.8                |
| <b>Chronic kidney disease</b>                 | 14.1             | 15.5              | 12.7                |
| <b>Chronic dialysis</b>                       | 0.9              | 1.0               | 0.8                 |
| <b>Chronic lung disease</b>                   | 16.2             | 14.3              | 18.2                |
| Asthma                                        | 7.4              | 4.8               | 10.2                |
| COPD                                          | 9.8              | 10.1              | 9.6                 |
| Pulmonary fibrosis                            | 0.9              | 1.1               | 0.8                 |

**Diabetes Mellitus**

|                   |      |      |      |
|-------------------|------|------|------|
| Type I            | 1.4  | 1.5  | 1.3  |
| Type II, diabetic | 25.4 | 26.1 | 24.5 |
| Diabetes unknown  | 3.3  | 3.4  | 3.2  |

**Liver disease**

|  |     |     |     |
|--|-----|-----|-----|
|  | 2.6 | 3.1 | 2.1 |
|--|-----|-----|-----|

**Hospitalization with infection in the past**

|  |     |     |     |
|--|-----|-----|-----|
|  | 8.3 | 8.1 | 8.5 |
|--|-----|-----|-----|

---

**year**

---

eTable 2. Baseline Characteristics of US Hospitalized Adult COVID-19 Patients by Age Group – Overall Cohort

| Characteristic                            | Patient, %             |                         |                         |                       |
|-------------------------------------------|------------------------|-------------------------|-------------------------|-----------------------|
|                                           | Age 18-34<br>(n= 7859) | Age 35-49<br>(n= 12365) | Age 50-64<br>(n= 20382) | Age 65+<br>(n= 26850) |
| <b>Age, Mean[SD],y</b>                    | 27.39(4.6)             | 42.64(4.4)              | 57.42(4.3)              | 75.10(6.9)            |
| <b>Sex (Males)</b>                        | 42.4                   | 50.4                    | 54.5                    | 51.6                  |
| <b>Race</b>                               |                        |                         |                         |                       |
| White                                     | 47.0                   | 46.8                    | 54.3                    | 64.5                  |
| Black or African American                 | 27.1                   | 25.2                    | 25.7                    | 20.4                  |
| American Indian or Alaska Native          | 0.6                    | 0.8                     | 0.6                     | 0.4                   |
| Asian                                     | 2.8                    | 3.3                     | 3.4                     | 3.1                   |
| Native Hawaiian or Other Pacific Islander | 0.3                    | 0.5                     | 0.4                     | 0.2                   |
| Unknown                                   | 22.2                   | 23.3                    | 15.7                    | 11.3                  |
| <b>Ethnicity</b>                          |                        |                         |                         |                       |
| Hispanic                                  | 24.1                   | 25.2                    | 17.3                    | 8.9                   |
| <b>Month of index</b>                     |                        |                         |                         |                       |
| February, 2020                            | 0.9                    | 1.2                     | 1.4                     | 1.2                   |
| March, 2020                               | 6.5                    | 7.8                     | 7.3                     | 5.8                   |
| April, 2020                               | 11.3                   | 12.5                    | 11.1                    | 10.3                  |
| May, 2020                                 | 8.5                    | 8.5                     | 7.1                     | 6.4                   |
| June, 2020                                | 9.9                    | 9.0                     | 7.6                     | 6.6                   |
| Jul, 2020                                 | 12.9                   | 12.3                    | 11.5                    | 9.8                   |
| August, 2020                              | 7.6                    | 6.7                     | 6.3                     | 6.2                   |
| September, 2020                           | 5.9                    | 5.3                     | 5.0                     | 5.2                   |
| October, 2020                             | 8.0                    | 8.3                     | 8.5                     | 8.8                   |
| November, 2020                            | 12.9                   | 13.7                    | 15.6                    | 17.9                  |
| December, 2020                            | 14.6                   | 13.7                    | 17.6                    | 20.5                  |
| January, 2021                             | 0.8                    | 0.9                     | 1.0                     | 1.2                   |
| <b>US Census division</b>                 |                        |                         |                         |                       |
| Midwest                                   | 12.0                   | 12.2                    | 15.0                    | 18.7                  |
| Northeast                                 | 17.7                   | 14.2                    | 12.8                    | 11.5                  |
| South                                     | 47.8                   | 48.8                    | 46.0                    | 42.9                  |
| West                                      | 6.3                    | 5.3                     | 4.3                     | 2.4                   |
| <b>Baseline Comorbidities</b>             |                        |                         |                         |                       |
| <i>Gastrointestinal disorders</i>         | 19.7                   | 22.3                    | 27.2                    | 31.8                  |
| <i>Skin disorder</i>                      | 10.9                   | 11.4                    | 12.7                    | 16.4                  |
| Atopic dermatitis                         | 0.3                    | 0.3                     | 0.2                     | 0.2                   |
| <i>Autoimmune diseases</i>                |                        |                         |                         |                       |
| Systemic lupus erythematosus              | 0.7                    | 0.8                     | 0.7                     | 0.4                   |
| Rheumatoid arthritis                      | 0.3                    | 0.7                     | 1.5                     | 2.0                   |
| Psoriasis, including psoriatic arthritis  | 0.3                    | 0.6                     | 0.7                     | 0.6                   |
| Inflammatory bowel disease                | 0.3                    | 0.2                     | 0.2                     | 0.1                   |
| Multiple sclerosis                        | 0.3                    | 0.5                     | 0.6                     | 0.4                   |
| Glomerulonephritis                        | 0.6                    | 0.5                     | 0.4                     | 0.2                   |
| Autoimmune thyroid disease                | 0.3                    | 0.3                     | 0.2                     | 0.2                   |
| <i>Cancer</i>                             | 2.5                    | 3.9                     | 7.4                     | 11.7                  |
| Solid tumors                              | 1.3                    | 2.7                     | 5.5                     | 9.3                   |
| Breast                                    | 0.2                    | 0.7                     | 1.0                     | 1.5                   |

|                                                                |      |      |      |      |
|----------------------------------------------------------------|------|------|------|------|
| Prostate                                                       | 0.0  | 0.1  | 0.6  | 2.4  |
| Lung                                                           | 0.2  | 0.3  | 1.0  | 1.7  |
| Other                                                          | 1.2  | 2.1  | 4.2  | 5.9  |
| Hematologic malignancies                                       | 1.5  | 1.6  | 2.7  | 3.5  |
| Leukemia                                                       | 0.3  | 0.3  | 0.6  | 0.9  |
| Lymphoma                                                       | 0.4  | 0.4  | 0.6  | 0.8  |
| Multiple myeloma (MM)                                          | 0.0  | 0.1  | 0.5  | 0.5  |
| Other                                                          | 0.9  | 0.8  | 1.3  | 1.6  |
| <i>Cardiovascular disease</i>                                  | 11.9 | 28.2 | 47.5 | 64.2 |
| Coronary artery disease                                        | 0.5  | 3.0  | 9.6  | 21.2 |
| Peripheral vascular disease                                    | 0.4  | 1.2  | 3.6  | 7.3  |
| Cerebrovascular disease                                        | 0.5  | 1.2  | 2.6  | 6.8  |
| Hypertension                                                   | 11.0 | 26.6 | 44.0 | 58.1 |
| Congestive heart failure                                       | 1.5  | 4.4  | 8.7  | 17.4 |
| Atrial Fibrillation                                            | 0.5  | 1.6  | 5.5  | 17.6 |
| <i>Chronic kidney disease</i>                                  | 3.3  | 7.1  | 12.3 | 21.9 |
| Stage I                                                        | 0.1  | 0.1  | 0.1  | 0.2  |
| Stage II                                                       | 0.3  | 0.6  | 1.3  | 1.8  |
| Stage III                                                      | 0.8  | 1.9  | 4.1  | 9.5  |
| Stage IV                                                       | 0.5  | 1.0  | 1.7  | 3.3  |
| Stage V (end stage renal disease)                              | 1.3  | 2.8  | 3.5  | 3.3  |
| Unknown                                                        | 2.8  | 6.3  | 10.9 | 19.1 |
| <i>Chronic dialysis</i>                                        | 0.4  | 0.9  | 15.2 | 21.5 |
| Hemodialysis                                                   | 0.4  | 0.8  | 1.0  | 1.0  |
| Peritoneal dialysis                                            | 0.0  | 0.0  | 0.0  | 0.0  |
| <i>Chronic lung disease</i>                                    | 9.9  | 10.5 | 15.2 | 21.4 |
| Asthma                                                         | 9.3  | 8.5  | 7.9  | 6.0  |
| Chronic obstructive pulmonary disease                          | 0.6  | 2.4  | 8.6  | 16.9 |
| Pulmonary fibrosis                                             | 0.2  | 0.5  | 0.7  | 1.6  |
| <i>Diabetes mellitus</i>                                       |      |      |      |      |
| Type I                                                         | 2.5  | 1.8  | 1.3  | 1.0  |
| Type II, diabetic                                              | 7.1  | 17.6 | 28.3 | 32.0 |
| Diabetes mellitus_unknown                                      | 1.3  | 2.4  | 3.6  | 4.0  |
| <i>Human immunodeficiency virus</i>                            | 0.8  | 1.0  | 1.1  | 0.3  |
| <i>Liver disease</i>                                           | 0.9  | 2.1  | 3.7  | 2.5  |
| Chronic hepatitis                                              | 0.3  | 0.6  | 1.3  | 0.7  |
| Cirrhosis                                                      | 0.4  | 1.5  | 2.8  | 2.0  |
| Non-alcoholic steatohepatitis                                  | 0.2  | 0.4  | 0.7  | 0.5  |
| <i>Major movement or cognitive disorder (excluding stroke)</i> | 0.8  | 1.5  | 3.7  | 15.0 |
| <i>Obstructive sleep apnea</i>                                 | 2.5  | 5.9  | 8.8  | 8.3  |
| <i>Hospitalization with infection in the past year</i>         | 6.3  | 7.0  | 7.9  | 9.8  |
| <i>Transplant history</i>                                      | 0.4  | 0.6  | 0.5  | 0.2  |

eTable 3. Baseline Characteristics of US Hospitalized Adult COVID-19 Patients by Time Period – Overall Cohort

| Characteristics                              | Patient, No. (%)                       |                                        |                                        |                                        |
|----------------------------------------------|----------------------------------------|----------------------------------------|----------------------------------------|----------------------------------------|
|                                              | Feb, 2020 -<br>Apr, 2020<br>(n= 12800) | May, 2020 -<br>Jul, 2020<br>(n= 17634) | Aug, 2020 -<br>Oct, 2020<br>(n= 13635) | Nov, 2020 -<br>Jan, 2020<br>(n= 23326) |
| <b>Age, Mean[SD], y</b>                      | 57.3(17.1)                             | 56.1(17.3)                             | 57.8(17.4)                             | 60.6(17.0)                             |
| 18-34                                        | 11.6                                   | 13.9                                   | 12.4                                   | 9.5                                    |
| 35-49                                        | 20.8                                   | 20.9                                   | 18.4                                   | 15.0                                   |
| 50-64                                        | 31.4                                   | 30.4                                   | 29.6                                   | 29.9                                   |
| 65+                                          | 36.3                                   | 34.8                                   | 39.7                                   | 45.6                                   |
| <b>Sex (Male)</b>                            | 53.4                                   | 50.7                                   | 49.9                                   | 51.0                                   |
| <b>Race</b>                                  |                                        |                                        |                                        |                                        |
| White                                        | 44.4                                   | 50.0                                   | 61.9                                   | 63.8                                   |
| Black or African American                    | 27.7                                   | 26.9                                   | 20.8                                   | 20.7                                   |
| American Indian or Alaska<br>Native          | 0.5                                    | 0.9                                    | 0.5                                    | 0.4                                    |
| Asian                                        | 2.6                                    | 4.4                                    | 3.2                                    | 2.6                                    |
| Native Hawaiian or Other<br>Pacific Islander | 0.1                                    | 0.4                                    | 0.4                                    | 0.3                                    |
| Unknown                                      | 24.6                                   | 17.4                                   | 0.0                                    | 12.3                                   |
| <b>Ethnicity</b>                             |                                        |                                        |                                        |                                        |
| Hispanic                                     | 16.5                                   | 24.8                                   | 15.9                                   | 9.6                                    |
| <b>US Census division</b>                    |                                        |                                        |                                        |                                        |
| Midwest                                      | 9.9                                    | 11.8                                   | 15.2                                   | 21.9                                   |
| Northeast                                    | 27.7                                   | 6.6                                    | 5.2                                    | 14.7                                   |
| South                                        | 35.9                                   | 58.1                                   | 51.4                                   | 37.9                                   |
| West                                         | 6.3                                    | 4.3                                    | 5.1                                    | 1.7                                    |
| <b>Baseline Comorbidities</b>                |                                        |                                        |                                        |                                        |
| <i>Gastrointestinal disorders</i>            | 27.8                                   | 23.7                                   | 27.9                                   | 29.4                                   |
| <i>Skin disorder</i>                         | 15.8                                   | 11.6                                   | 13.3                                   | 14.4                                   |
| Atopic dermatitis                            | 0.4                                    | 0.2                                    | 0.2                                    | 0.2                                    |
| <i>Autoimmune disease</i>                    |                                        |                                        |                                        |                                        |
| Systemic lupus erythematosus                 | 0.7                                    | 0.5                                    | 0.6                                    | 0.6                                    |
| Rheumatoid arthritis                         | 1.5                                    | 1.0                                    | 1.3                                    | 1.7                                    |
| Psoriasis, including psoriatic<br>arthritis  | 0.6                                    | 0.5                                    | 0.6                                    | 0.7                                    |
| Inflammatory bowel disease                   | 0.2                                    | 0.1                                    | 0.2                                    | 0.2                                    |
| Multiple sclerosis                           | 0.5                                    | 0.4                                    | 0.4                                    | 0.5                                    |
| Glomerulonephritis                           | 0.4                                    | 0.4                                    | 0.3                                    | 0.3                                    |
| Autoimmune thyroid disease                   | 0.3                                    | 0.2                                    | 0.2                                    | 0.2                                    |
| <i>Cancer</i>                                | 8.2                                    | 6.8                                    | 8.0                                    | 8.5                                    |
| Solid tumors                                 | 6.0                                    | 5.3                                    | 6.2                                    | 6.5                                    |
| Breast                                       | 1.0                                    | 0.9                                    | 1.2                                    | 1.1                                    |
| Prostate                                     | 1.1                                    | 0.9                                    | 1.1                                    | 1.3                                    |
| Lung                                         | 1.2                                    | 0.9                                    | 1.0                                    | 1.1                                    |
| Other                                        | 4.1                                    | 3.7                                    | 4.1                                    | 4.4                                    |

|                                                                |      |      |      |      |
|----------------------------------------------------------------|------|------|------|------|
| Hematologic malignancies                                       | 3.2  | 2.1  | 2.7  | 2.8  |
| Leukemia                                                       | 0.8  | 0.5  | 0.6  | 0.7  |
| Lymphoma                                                       | 0.9  | 0.4  | 0.5  | 0.7  |
| Multiple myeloma (MM)                                          | 0.3  | 0.3  | 0.3  | 0.4  |
| Other                                                          | 1.6  | 1.0  | 1.3  | 1.3  |
| <i>Cardiovascular disease</i>                                  | 45.8 | 39.2 | 45.8 | 52.7 |
| Coronary artery disease                                        | 11.8 | 9.3  | 11.8 | 14.2 |
| Peripheral vascular disease                                    | 4.9  | 3.7  | 3.9  | 4.5  |
| Cerebrovascular disease                                        | 4.1  | 2.8  | 3.4  | 4.6  |
| Hypertension                                                   | 42.1 | 35.9 | 42.0 | 48.2 |
| Congestive heart failure                                       | 11.0 | 9.1  | 9.6  | 11.9 |
| Atrial Fibrillation                                            | 9.0  | 6.9  | 8.7  | 10.9 |
| <i>Chronic kidney disease</i>                                  | 14.9 | 11.7 | 13.4 | 15.9 |
| Stage I                                                        | 0.3  | 0.1  | 0.2  | 0.1  |
| Stage II                                                       | 1.5  | 1.1  | 1.2  | 1.3  |
| Stage III                                                      | 6.6  | 4.8  | 5.4  | 5.3  |
| Stage IV                                                       | 2.2  | 1.6  | 2.0  | 2.4  |
| Stage V (end stage renal disease)                              | 3.3  | 2.9  | 2.7  | 3.2  |
| Unknown                                                        | 12.8 | 10.3 | 11.9 | 14.0 |
| <i>Chronic dialysis</i>                                        | 1.0  | 0.8  | 0.8  | 1.0  |
| Hemodialysis                                                   | 1.0  | 0.8  | 0.8  | 1.0  |
| Peritoneal dialysis                                            | 0.0  | 0.0  | 0.0  | 0.0  |
| <i>Chronic lung disease</i>                                    | 16.9 | 12.5 | 16.3 | 18.6 |
| Asthma                                                         | 8.0  | 6.0  | 7.4  | 8.1  |
| COPD                                                           | 10.1 | 7.3  | 9.8  | 11.7 |
| Pulmonary fibrosis                                             | 1.2  | 0.7  | 0.9  | 1.0  |
| <i>Diabetes mellitus</i>                                       |      |      |      |      |
| Type I                                                         | 1.8  | 1.3  | 1.2  | 1.4  |
| Type II, diabetic                                              | 25.3 | 22.5 | 24.6 | 27.9 |
| Diabetes mellitus_unknown                                      | 4.1  | 2.6  | 2.5  | 3.8  |
| <i>Human immunodeficiency virus</i>                            | 1.0  | 0.7  | 0.7  | 0.6  |
| <i>Liver disease</i>                                           | 3.0  | 2.4  | 2.6  | 2.5  |
| Chronic hepatitis                                              | 1.2  | 0.8  | 0.7  | 0.6  |
| Cirrhosis                                                      | 2.0  | 1.8  | 2.1  | 1.9  |
| Non-alcoholic steatohepatitis                                  | 0.5  | 0.4  | 0.6  | 0.5  |
| <i>Major movement or cognitive disorder (excluding stroke)</i> | 8.5  | 6.4  | 6.9  | 8.1  |
| <i>Obstructive sleep apnea</i>                                 | 7.1  | 5.7  | 7.2  | 8.8  |
| <i>Hospitalization with infection in the past year</i>         | 11.1 | 7.1  | 7.8  | 8.0  |
| <i>Transplant history</i>                                      | 0.3  | 0.3  | 0.4  | 0.5  |

eTable 4 The Percentage of Hospitalized Adult COVID-19 Patient by Region in ex-US Analysis

| Region | % of Hospitalized Adult COVID-19 Patients |
|--------|-------------------------------------------|
| Europe | 91.4%                                     |
| LATAM  | 8.5%                                      |
| APAC   | 0.1%                                      |

LATAM: Latin America; APAC: Asia-Pacific



eTable 5. Drug Treatment receipt among US Adult Hospitalized COVID-19 patients – Overall Cohort

| <b>Treatment</b>   | <b>Patient, % (N=67456)</b> |
|--------------------|-----------------------------|
| Acetaminophen      | 67.11%                      |
| Enoxaparin         | 49.47%                      |
| Dexamethasone      | 37.69%                      |
| Insulin            | 32.74%                      |
| Opioids            | 31.44%                      |
| Aspirin            | 26.69%                      |
| Azithromycin       | 23.72%                      |
| Atorvastatin       | 21.44%                      |
| Remdesivir         | 20.26%                      |
| Methylprednisolone | 19.82%                      |
| Heparin            | 14.77%                      |
| Melatonin          | 13.42%                      |
| Zinc               | 13.00%                      |
| Prednisone         | 11.91%                      |
| Ibuprofen          | 11.78%                      |
| Doxycycline        | 8.83%                       |
| Apixaban           | 8.72%                       |
| Hydroxychloroquine | 7.18%                       |
| Chloroquine        | 7.16%                       |
| Vitamin D          | 6.89%                       |
| Thiamine           | 5.63%                       |
| Levofloxacin       | 5.54%                       |
| Rosuvastatin       | 5.41%                       |
| Clopidogrel        | 5.21%                       |
| Hydrocortisone     | 4.92%                       |
| Amoxicillin        | 4.25%                       |
| Budesonide         | 4.25%                       |
| Rivaroxaban        | 3.95%                       |
| Amiodarone         | 3.91%                       |
| Montelukast        | 3.46%                       |
| Formoterol         | 3.26%                       |
| Alteplase          | 3.17%                       |
| Pravastatin        | 2.83%                       |
| Simvastatin        | 2.62%                       |
| Trimethoprim       | 2.33%                       |
| Tacrolimus         | 1.68%                       |
| Warfarin           | 1.60%                       |
| Hemodialysis       | 1.42%                       |

eTable 6. Drug Treatment receipt among ex-US Adult Hospitalized COVID-19 patients

| <b>Treatment</b>        | <b>Patient, % (N=67456)</b> |
|-------------------------|-----------------------------|
| Acetaminophen           | 64.6%                       |
| Azithromycin            | 38.9%                       |
| Hydroxychloroquine      | 29.0%                       |
| Methylprednisolone      | 21.4%                       |
| Insulin                 | 20.2%                       |
| Dexamethasone           | 19.9%                       |
| Amoxicillin             | 18.9%                       |
| Other Bronchodilators   | 14.0%                       |
| Tocilizumab             | 8.3%                        |
| Atorvastatin            | 7.9%                        |
| Aspirin                 | 7.9%                        |
| Formoterol              | 6.3%                        |
| Prednisone              | 5.5%                        |
| Levofloxacin            | 5.4%                        |
| Simvastatin             | 5.3%                        |
| Clopidogrel             | 1.8%                        |
| Thiamine                | 1.4%                        |
| Apixaban                | 1.2%                        |
| Rivaroxaban             | 1.2%                        |
| Amiodarone              | 1.1%                        |
| Montelukast             | 0.9%                        |
| Rosuvastatin            | 0.7%                        |
| Remdesivir              | 0.5%                        |
| Pravastatin             | 0.2%                        |
| Other Antihypertensives | 0.2%                        |
| Warfarin                | 0.1%                        |

eTable 7: Selected Outcomes Percentage of US Adult Hospitalized COVID-19 Patients – Overall Cohort

| Category              | ICU Admission |        | ARDS/Respiratory Failure |        | IMV   |        | All-Cause Mortality |       |
|-----------------------|---------------|--------|--------------------------|--------|-------|--------|---------------------|-------|
|                       | N             | %      | N                        | %      | N     | %      | N                   | %     |
| <b>Gender</b>         |               |        |                          |        |       |        |                     |       |
| Male                  | 34518         | 16.89% | 32560                    | 40.98% | 34518 | 13.65% | 34518               | 6.14% |
| Female                | 32938         | 12.33% | 30946                    | 32.78% | 32938 | 9.36%  | 32938               | 4.56% |
| <b>Age</b>            |               |        |                          |        |       |        |                     |       |
| 18-34                 | 7859          | 7.23%  | 7678                     | 18.26% | 7859  | 5.06%  | 7859                | 0.83% |
| 35-49                 | 12365         | 11.23% | 11957                    | 30.96% | 12365 | 8.63%  | 12365               | 1.78% |
| 50-64                 | 20382         | 15.71% | 19240                    | 40.31% | 20382 | 12.82% | 20382               | 3.79% |
| 65+                   | 26850         | 17.62% | 24631                    | 43.14% | 26850 | 13.84% | 26850               | 9.55% |
| <b>Time Period</b>    |               |        |                          |        |       |        |                     |       |
| Feb, 2020 - Apr, 2020 | 12800         | 20.88% | 11924                    | 41.11% | 12800 | 17.89% | 12800               | 6.52% |
| May, 2020 - Jul, 2020 | 17634         | 14.46% | 16805                    | 33.04% | 17634 | 11.53% | 17634               | 5.33% |
| Aug, 2020 - Oct, 2020 | 13635         | 13.19% | 12890                    | 36.97% | 13635 | 10.21% | 13635               | 4.73% |
| Nov, 2020 - Jan, 2021 | 23326         | 12.21% | 21837                    | 37.73% | 23326 | 8.82%  | 23326               | 5.16% |

### Sensitivity Analysis

eFigure 1. Patient Flow Diagram of US Adult Hospitalized COVID-19 Patients – Confirmed Cohort

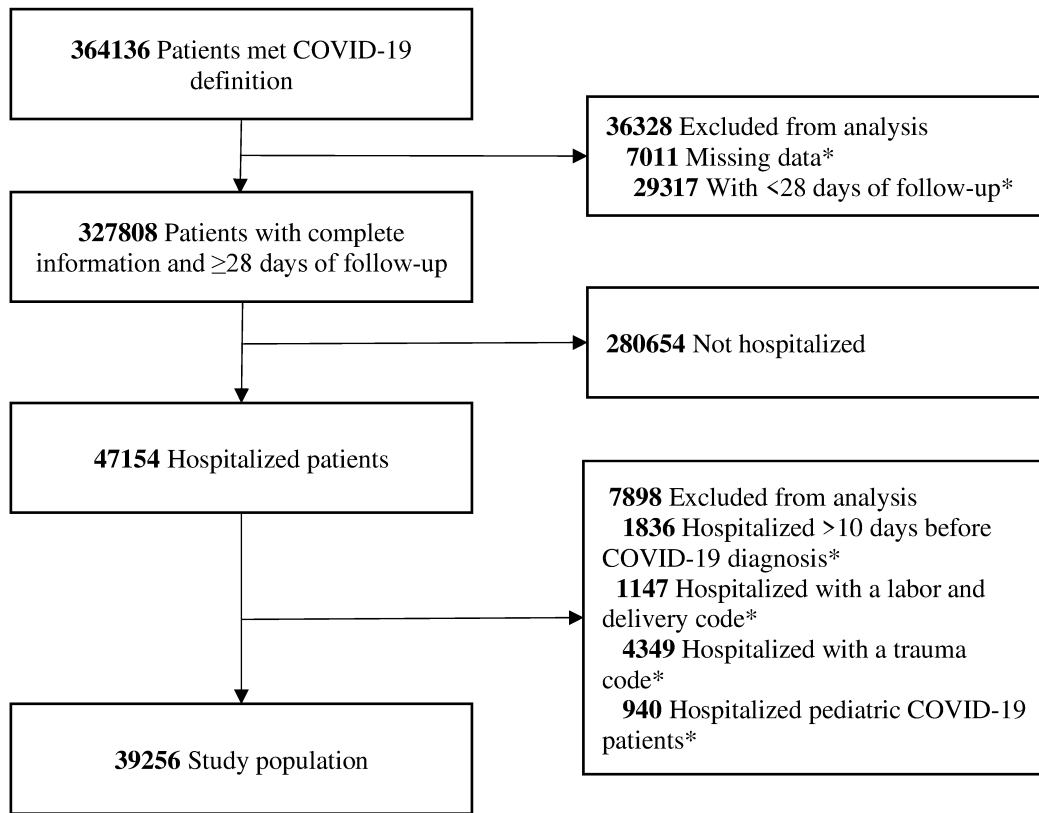

\*The counts were not mutual exclusive.

eTable 8. Baseline Characteristics of US Hospitalized Adult COVID-19 Patient Overall and by Gender – Confirmed Cohort

| Characteristic                            | Patients, %      |                   |                     |
|-------------------------------------------|------------------|-------------------|---------------------|
|                                           | All<br>(n=39256) | Male<br>(n=19965) | Female<br>(n=19291) |
| <b>Age, Mean [SD], y</b>                  | 57(17.54)        | 58.4(16.7)        | 57.2(18.4)          |
| 18-34                                     | 12.6             | 10.4              | 14.8                |
| 35-49                                     | 18.5             | 18.5              | 18.6                |
| 50-64                                     | 29.8             | 31.7              | 27.9                |
| 65+                                       | 39.1             | 39.4              | 38.7                |
| <b>Race</b>                               |                  |                   |                     |
| White                                     | 54.9             | 56.3              | 53.5                |
| Black or African American                 | 25.5             | 23.1              | 28.0                |
| American Indian or Alaska Native          | 0.5              | 0.5               | 0.5                 |
| Asian                                     | 2.8              | 2.9               | 2.6                 |
| Native Hawaiian or Other Pacific Islander | 0.3              | 0.3               | 0.2                 |
| Unknown                                   | 16.0             | 16.9              | 15.1                |
| <b>Ethnicity</b>                          |                  |                   |                     |
| Hispanic                                  | 18.9             | 19.7              | 18.0                |
| <b>Site of Diagnosis</b>                  |                  |                   |                     |
| Inpatient                                 | 83.5             | 84.8              | 82.2                |
| Other                                     | 16.5             | 15.2              | 17.8                |
| <b>Mode of Diagnosis</b>                  |                  |                   |                     |
| Both Diagnosis and lab                    | 81.2             | 81.9              | 80.5                |
| Lab                                       | 18.8             | 18.1              | 19.5                |
| <b>Month of Index</b>                     |                  |                   |                     |
| Feb-20                                    | 0.8              | 1.0               | 0.6                 |
| Mar-20                                    | 6.6              | 7.1               | 6.2                 |
| Apr-20                                    | 11.3             | 11.8              | 10.7                |
| May-20                                    | 7.5              | 7.6               | 7.3                 |
| Jun-20                                    | 8.0              | 8.1               | 8.0                 |
| Jul-20                                    | 11.3             | 11.0              | 11.7                |
| Aug-20                                    | 6.3              | 6.0               | 6.7                 |
| Sep-20                                    | 5.0              | 4.8               | 5.2                 |
| Oct-20                                    | 8.5              | 8.4               | 8.5                 |
| Nov-20                                    | 16.4             | 16.0              | 16.8                |
| Dec-20                                    | 17.3             | 17.2              | 17.3                |
| Jan-21                                    | 1.1              | 1.1               | 1.1                 |
| <b>US Census Division</b>                 |                  |                   |                     |
| Midwest                                   | 19.9             | 19.8              | 20.0                |
| Northeast                                 | 14.8             | 14.7              | 14.9                |
| South                                     | 46.6             | 45.5              | 47.8                |
| West                                      | 4.9              | 5.1               | 4.7                 |
| Unknown                                   | 13.8             | 14.91             | 12.58               |
| <b>Baseline Comorbidities</b>             |                  |                   |                     |
| <i>Gastrointestinal disorders</i>         | 25.1             | 22.3              | 28.0                |
| <i>Skin disorder</i>                      | 13.7             | 12.5              | 14.8                |
| Atopic dermatitis (AD)                    | 0.3              | 0.2               | 0.3                 |
| <i>Autoimmune disease</i>                 |                  |                   |                     |

|                                                                |      |      |      |
|----------------------------------------------------------------|------|------|------|
| Systemic lupus erythematosus                                   | 0.5  | 0.2  | 0.9  |
| Rheumatoid arthritis                                           | 1.2  | 0.7  | 1.7  |
| Psoriasis, including psoriatic arthritis                       | 0.6  | 0.5  | 0.6  |
| Inflammatory bowel disease                                     | 0.2  | 0.1  | 0.2  |
| Multiple sclerosis                                             | 0.4  | 0.3  | 0.5  |
| Glomerulonephritis                                             | 0.3  | 0.3  | 0.4  |
| Autoimmune thyroid disease                                     | 0.2  | 0.1  | 0.3  |
| <i>Cancer</i>                                                  | 7.0  | 7.4  | 6.6  |
| Solid tumors                                                   | 5.4  | 5.7  | 5.0  |
| Breast                                                         | 1.0  | 0.0  | 1.9  |
| Prostate                                                       | 1.1  | 2.1  | 0.0  |
| Lung                                                           | 0.9  | 1.0  | 0.8  |
| Other                                                          | 3.6  | 3.9  | 3.3  |
| Hematologic malignancies                                       | 2.4  | 2.4  | 2.3  |
| Leukemia                                                       | 0.5  | 0.6  | 0.5  |
| Lymphoma                                                       | 0.6  | 0.6  | 0.5  |
| Multiple myeloma (MM)                                          | 0.4  | 0.4  | 0.3  |
| Other                                                          | 1.1  | 1.1  | 1.1  |
| <i>Cardiovascular disease</i>                                  | 41.5 | 42.5 | 40.3 |
| Coronary artery disease                                        | 10.9 | 13.5 | 8.1  |
| Peripheral vascular disease                                    | 3.9  | 4.4  | 3.4  |
| Cerebrovascular disease                                        | 3.8  | 3.9  | 3.7  |
| Hypertension                                                   | 37.6 | 38.0 | 37.2 |
| Congestive heart failure                                       | 9.1  | 9.5  | 8.7  |
| Atrial Fibrillation                                            | 7.8  | 9.0  | 6.6  |
| <i>Chronic kidney disease</i>                                  | 12.4 | 13.3 | 11.4 |
| Stage I                                                        | 0.1  | 0.1  | 0.1  |
| Stage II                                                       | 1.3  | 1.5  | 1.0  |
| Stage III                                                      | 5.3  | 5.5  | 5.1  |
| Stage IV                                                       | 1.9  | 1.9  | 2.0  |
| Stage V (End stage renal disease)                              | 2.5  | 2.8  | 2.2  |
| Unknown                                                        | 10.7 | 11.5 | 9.9  |
| <i>Chronic dialysis</i>                                        | 0.7  | 0.7  | 0.7  |
| Hemodialysis                                                   | 0.7  | 0.7  | 0.7  |
| <i>Chronic lung disease</i>                                    | 13.9 | 11.9 | 15.9 |
| Asthma                                                         | 6.7  | 4.2  | 9.3  |
| COPD                                                           | 8.0  | 8.1  | 8.0  |
| Pulmonary fibrosis                                             | 0.7  | 0.8  | 0.6  |
| <i>Diabetes mellitus</i>                                       |      |      |      |
| Type I                                                         | 1.2  | 1.2  | 1.2  |
| Type II, diabetic                                              | 22.2 | 22.5 | 21.9 |
| Diabetes unknown                                               | 4.0  | 4.0  | 4.0  |
| <i>Human immunodeficiency virus</i>                            | 0.6  | 0.8  | 0.3  |
| <i>Liver disease</i>                                           | 2.3  | 2.8  | 1.8  |
| Chronic hepatitis                                              | 0.8  | 1.2  | 0.5  |
| Cirrhosis                                                      | 1.6  | 1.9  | 1.3  |
| Non-alcoholic steatohepatitis                                  | 0.5  | 0.4  | 0.6  |
| <i>Major movement or cognitive disorder (excluding stroke)</i> | 6.2  | 6.0  | 6.4  |
| <i>Obstructive sleep apnea</i>                                 | 7.1  | 7.4  | 6.8  |

---

|                                                        |     |     |     |
|--------------------------------------------------------|-----|-----|-----|
| <i>Hospitalization with infection in the past year</i> | 7.5 | 7.0 | 7.9 |
| <i>Transplant history</i>                              | 0.4 | 0.5 | 0.3 |

---

eTable 9: Selected Outcomes Percentage of US Adult Hospitalized COVID-19 Patients – Confirmed Cohort

| Category              | ICU Admission |        | ARDS/Respiratory Failure |        | IMV   |        | All-Cause Mortality |       |
|-----------------------|---------------|--------|--------------------------|--------|-------|--------|---------------------|-------|
|                       | N             | %      | N                        | %      | N     | %      | N                   | %     |
| <b>Gender</b>         |               |        |                          |        |       |        |                     |       |
| Male                  | 19965         | 15.65% | 18946                    | 36.41% | 19965 | 12.19% | 19965               | 4.94% |
| Female                | 19291         | 10.86% | 18222                    | 28.20% | 19291 | 7.74%  | 19291               | 3.66% |
| <b>Age</b>            |               |        |                          |        |       |        |                     |       |
| 18-34                 | 4931          | 5.21%  | 4849                     | 14.04% | 4931  | 3.45%  | 4931                | 0.34% |
| 35-49                 | 7275          | 9.33%  | 7070                     | 26.08% | 7275  | 6.83%  | 7275                | 0.93% |
| 50-64                 | 11713         | 14.07% | 11156                    | 35.50% | 11713 | 10.84% | 11713               | 2.68% |
| 65+                   | 15337         | 17.19% | 14093                    | 39.40% | 15337 | 12.98% | 15337               | 8.43% |
| <b>Time Period</b>    |               |        |                          |        |       |        |                     |       |
| Feb, 2020 - Apr, 2020 | 7332          | 15.71% | 6978                     | 35.05% | 7332  | 13.86% | 7332                | 4.69% |
| May, 2020 - Jul, 2020 | 10530         | 14.32% | 10089                    | 28.98% | 10530 | 10.53% | 10530               | 4.72% |
| Aug, 2020 - Oct, 2020 | 7757          | 13.23% | 7373                     | 33.45% | 7757  | 9.62%  | 7757                | 3.66% |
| Nov, 2020 - Jan, 2021 | 13626         | 11.24% | 12718                    | 33.02% | 13626 | 7.75%  | 13626               | 4.16% |



eTable 10. Treatment receipt among COVID-19 patients – Confirmed and Probable Cohorts

| Treatment          | Patient, %                    |                              |
|--------------------|-------------------------------|------------------------------|
|                    | Confirmed Cohort<br>(N=39256) | Probable Cohort<br>(N=28200) |
| Acetaminophen      | 74.4%                         | 57.0%                        |
| Enoxaparin         | 54.4%                         | 42.6%                        |
| Dexamethasone      | 41.5%                         | 32.4%                        |
| Insulin            | 34.7%                         | 30.0%                        |
| Opioids            | 32.3%                         | 30.2%                        |
| Aspirin            | 28.7%                         | 24.0%                        |
| Azithromycin       | 23.6%                         | 23.9%                        |
| Atorvastatin       | 23.3%                         | 18.8%                        |
| Remdesivir         | 22.8%                         | 16.7%                        |
| Methylprednisolone | 22.4%                         | 16.3%                        |
| Heparin            | 16.1%                         | 12.9%                        |
| Melatonin          | 14.1%                         | 12.5%                        |
| Zinc               | 13.7%                         | 12.0%                        |
| Ibuprofen          | 12.2%                         | 11.2%                        |
| Prednisone         | 12.1%                         | 11.7%                        |
| Apixaban           | 9.6%                          | 7.5%                         |
| Doxycycline        | 9.0%                          | 8.7%                         |
| Vitamin D          | 7.9%                          | 5.5%                         |
| Hydroxychloroquine | 7.4%                          | 6.9%                         |
| Chloroquine        | 7.4%                          | 6.8%                         |
| Rosuvastatin       | 7.0%                          | 3.2%                         |
| Thiamine           | 6.3%                          | 4.7%                         |
| Clopidogrel        | 5.4%                          | 4.9%                         |
| Rivaroxaban        | 5.1%                          | 2.4%                         |
| Levofloxacin       | 5.0%                          | 6.3%                         |
| Hydrocortisone     | 4.8%                          | 5.2%                         |
| Amoxicillin        | 4.2%                          | 4.3%                         |
| Budesonide         | 3.8%                          | 4.8%                         |
| Amiodarone         | 3.8%                          | 4.0%                         |
| Montelukast        | 3.6%                          | 3.2%                         |
| Pravastatin        | 3.1%                          | 2.4%                         |
| Alteplase          | 3.1%                          | 3.3%                         |
| Formoterol         | 3.1%                          | 3.6%                         |
| Simvastatin        | 2.4%                          | 3.0%                         |
| Trimethoprim       | 2.2%                          | 2.5%                         |
| Warfarin           | 1.8%                          | 1.3%                         |
| Tacrolimus         | 1.8%                          | 1.6%                         |
| Hemodialysis       | 0.9%                          | 2.1%                         |

## S2 Figure. The Forest Plots of Model-adjusted Hazard Ratios among US Hospitalized Adult Patients with COVID-19 by Gender, by Age Group, and by Time Period – Confirmed Cohort

### A) Gender

| Characteristics                  | Adjusted HR (95% CI) | Pr > ChiSq |
|----------------------------------|----------------------|------------|
| <b>Male (Reference : Female)</b> |                      |            |
| ICU Admission                    | 1.39 (1.32-1.47)     | <.0001     |
| IMV                              | 1.51 (1.41-1.61)     | <.0001     |
| ARDS/Respiratory Failure         | 1.28 (1.23-1.32)     | <.0001     |
| All-cause Mortality              | 1.16 (1.06-1.28)     | 0.0025     |

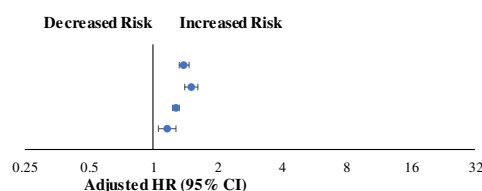

### B) Age

| Characteristics                 | Adjusted HR (95% CI) | Pr > ChiSq |
|---------------------------------|----------------------|------------|
| <b>ICU Admission</b>            |                      |            |
| 18-34                           | 1 (ref)              |            |
| 35-49                           | 1.53 (1.33-1.76)     | <.0001     |
| 50-64                           | 2.08 (1.82-2.37)     | <.0001     |
| 65+                             | 2.26 (1.98-2.58)     | <.0001     |
| <b>IMV</b>                      |                      |            |
| 18-34                           | 1 (ref)              |            |
| 35-49                           | 1.61 (1.35-1.91)     | <.0001     |
| 50-64                           | 2.42 (2.06-2.85)     | <.0001     |
| 65+                             | 2.69 (2.29-3.17)     | <.0001     |
| <b>ARDS/Respiratory Failure</b> |                      |            |
| 18-34                           | 1 (ref)              |            |
| 35-49                           | 1.66 (1.53-1.81)     | <.0001     |
| 50-64                           | 2.12 (1.96-2.30)     | <.0001     |
| 65+                             | 2.19 (2.02-2.38)     | <.0001     |
| <b>All-cause Mortality</b>      |                      |            |
| 18-34                           | 1 (ref)              |            |
| 35-49                           | 1.95 (1.14-3.31)     | 0.0141     |
| 50-64                           | 4.32 (2.65-7.03)     | <.0001     |
| 65+                             | 10.99 (6.79-17.78)   | <.0001     |

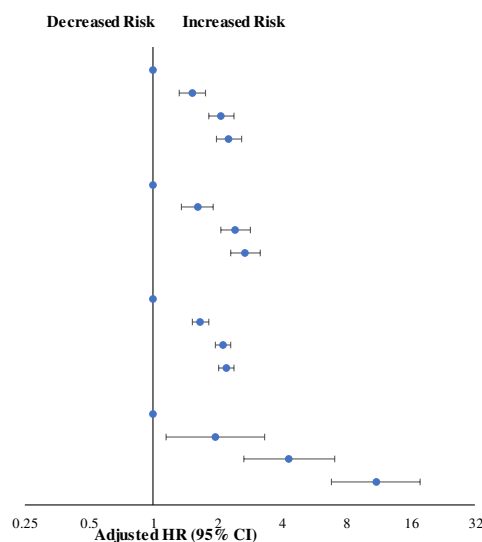

### C) Time Period

| Characteristics                 | Adjusted HR (95% CI) | Pr > ChiSq |
|---------------------------------|----------------------|------------|
| <b>ICU Admission</b>            |                      |            |
| Feb, 2020 - Apr, 2020           | 1 (ref)              |            |
| May, 2020 - Jul, 2020           | 0.94 (0.87-1.02)     | 0.1208     |
| Aug, 2020 - Oct, 2020           | 0.79 (0.73-0.87)     | <.0001     |
| Nov, 2020 - Jan, 2021           | 0.61 (0.57-0.66)     | <.0001     |
| <b>IMV</b>                      |                      |            |
| Feb, 2020 - Apr, 2020           | 1 (ref)              |            |
| May, 2020 - Jul, 2020           | 0.63 (0.58-0.69)     | <.0001     |
| Aug, 2020 - Oct, 2020           | 0.57 (0.52-0.63)     | <.0001     |
| Nov, 2020 - Jan, 2021           | 0.47 (0.43-0.52)     | <.0001     |
| <b>ARDS/Respiratory Failure</b> |                      |            |
| Feb, 2020 - Apr, 2020           | 1 (ref)              |            |
| May, 2020 - Jul, 2020           | 0.86 (0.82-0.91)     | <.0001     |
| Aug, 2020 - Oct, 2020           | 0.93 (0.88-0.99)     | 0.0117     |
| Nov, 2020 - Jan, 2021           | 0.88 (0.84-0.93)     | <.0001     |
| <b>All-cause Mortality</b>      |                      |            |
| Feb, 2020 - Apr, 2020           | 1 (ref)              |            |
| May, 2020 - Jul, 2020           | 0.99 (0.86-1.14)     | 0.929      |
| Aug, 2020 - Oct, 2020           | 0.72 (0.62-0.85)     | <.0001     |
| Nov, 2020 - Jan, 2021           | 0.80 (0.70-0.92)     | 0.0022     |

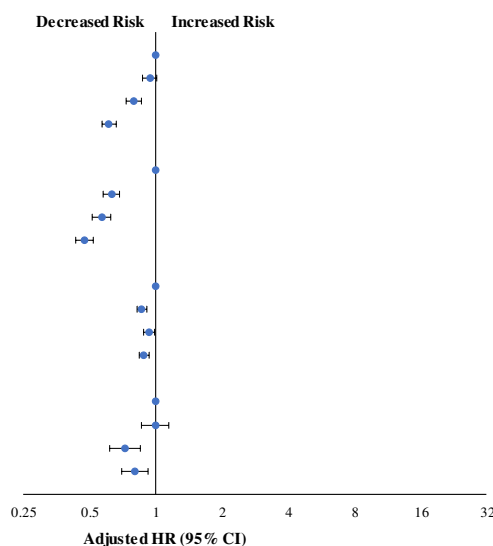

HR: the abbreviation of Hazard Ratio; ARDS: the abbreviation of acute respiratory distress syndrome; ICU: the abbreviation of intensive care unit; IMV: the abbreviation of invasive mechanical ventilation. Three separate Fine and Gray models were developed stratified by age group, gender, and time period; each model used the other two main categories of risk exposure (for example, gender and time period in the age group model) as covariates. The other covariates in each model were race, ethnicity, US region, hypertension, diabetes (Type I and II), active cancer, coronary artery disease, congestive heart failure, chronic kidney disease, chronic obstructive pulmonary disease (COPD), asthma, and obstructive sleep apnea.

S3 Figure. Model-adjusted Cumulative Incidence of Selected Outcomes among Hospitalized Adult Patients with COVID-19 by Gender, by Age Group, and by Time Period – Confirmed Cohort

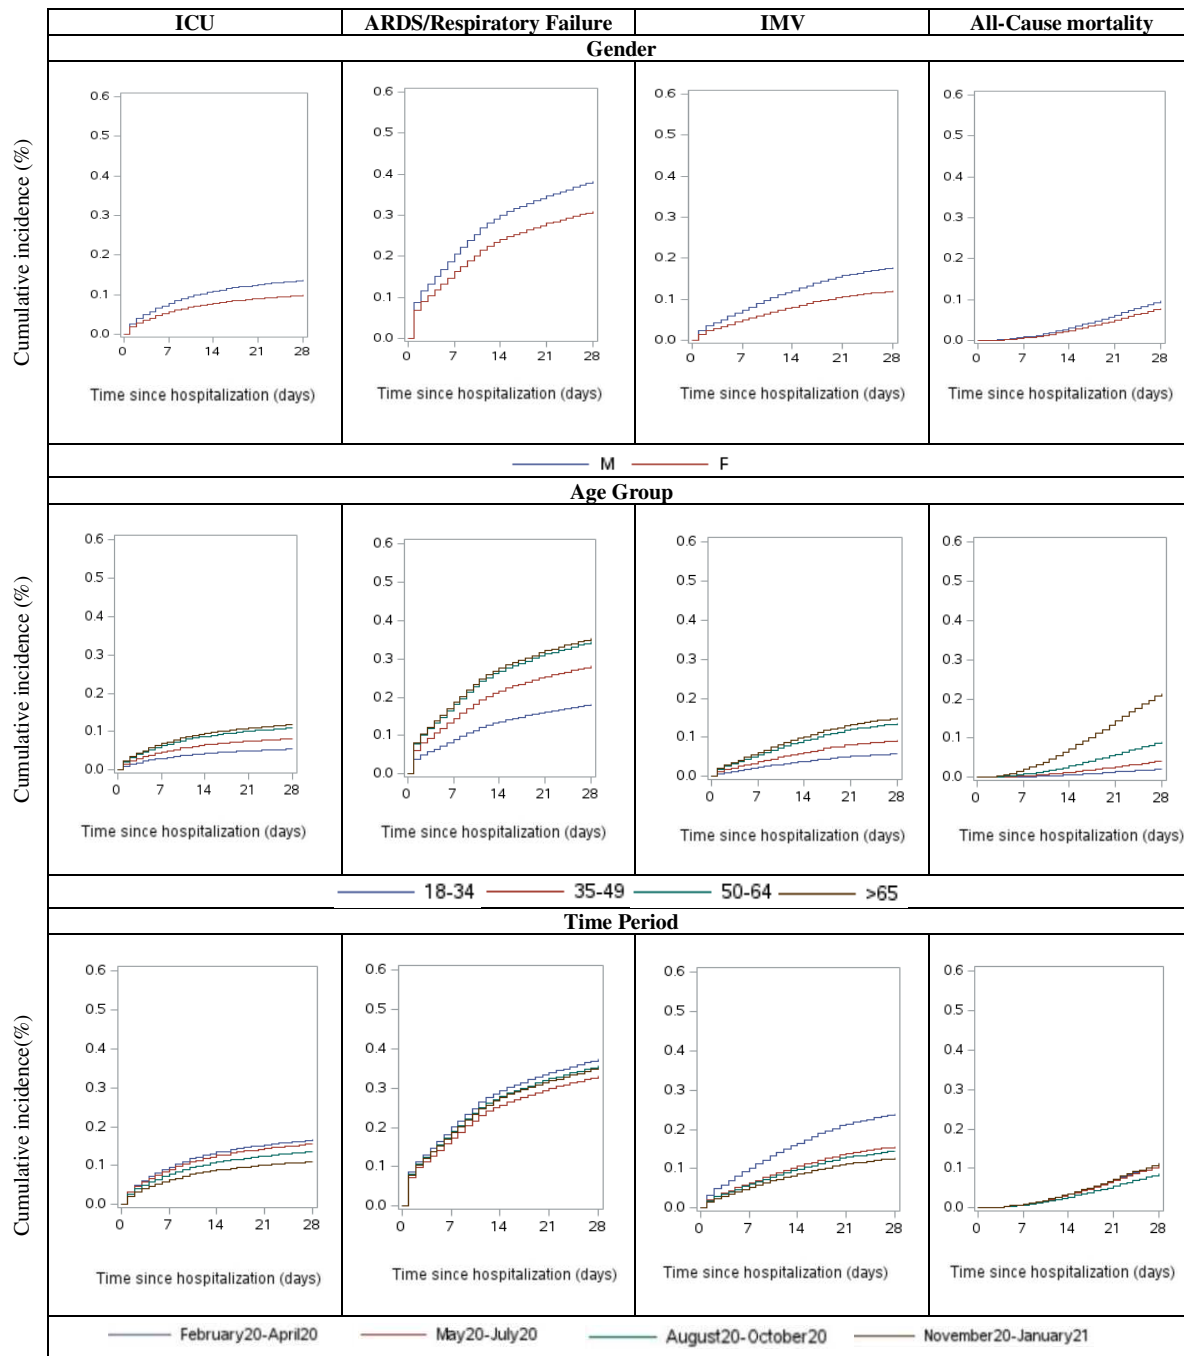

HR: the abbreviation of Hazard Ratio; ARDS: the abbreviation of acute respiratory distress syndrome; ICU: the abbreviation of intensive care unit; IMV: the abbreviation of invasive mechanical ventilation. Three separate Fine and Gray models were developed stratified by age group, gender, and time period; each model used the other two main categories of risk exposure (for example, gender and time period in the age group model) as covariates. The other covariates in each model were race, ethnicity, US region, hypertension, diabetes (Type I and II), active cancer, coronary artery disease, congestive heart failure, chronic kidney disease, chronic obstructive pulmonary disease (COPD), asthma, and obstructive sleep apnea.

eFigure 4. Patient Flow Diagram of US Adults Hospitalized with COVID-19 – Probable Cohort

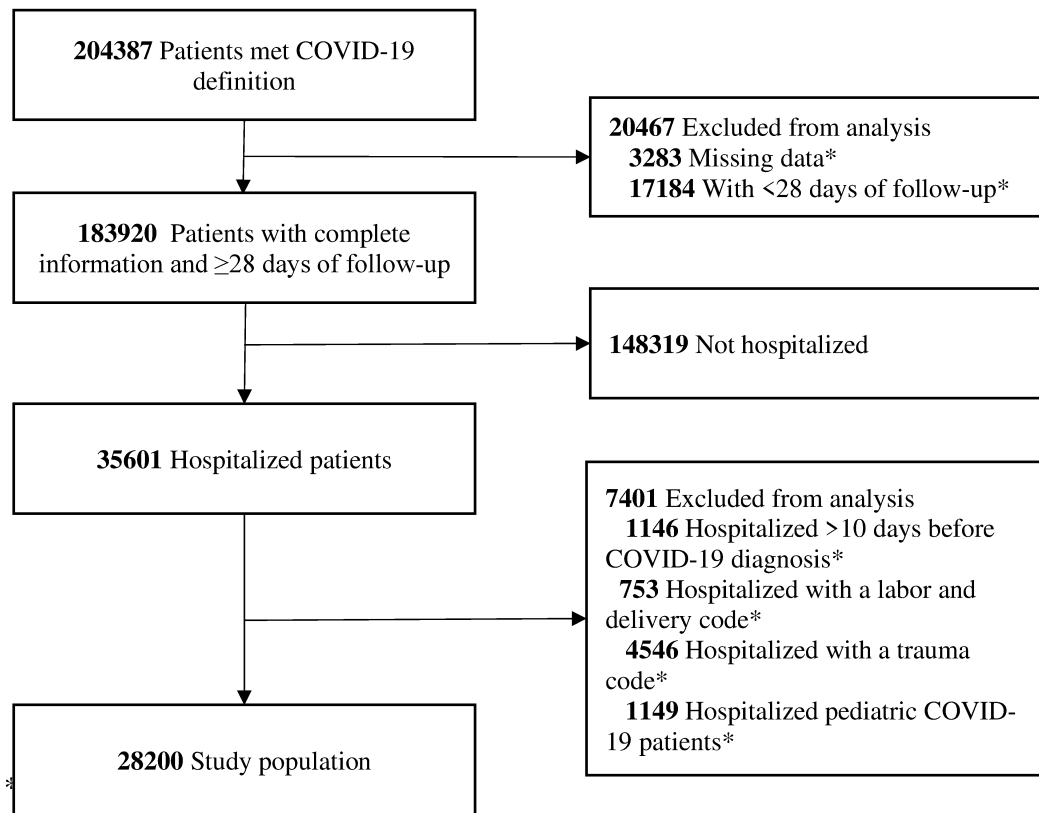

eTable 11. Baseline Characteristics among US Hospitalized Adult COVID-19 Patients Overall and by Gender– Probable Cohort

| Characteristic                    | Patient, %        |                    |                      |
|-----------------------------------|-------------------|--------------------|----------------------|
|                                   | All<br>(n= 28200) | Male<br>(n= 14553) | Female<br>(n= 13647) |
| <b>Age, Mean[SD], y</b>           | 58.8(16.9)        | 59.5(16.2)         | 58.2(17.7)           |
| 18-34                             | 10.4              | 8.6                | 12.3                 |
| 35-49                             | 18.0              | 17.5               | 18.7                 |
| 50-64                             | 30.7              | 32.8               | 28.6                 |
| 65+                               | 40.8              | 41.1               | 40.5                 |
| <b>Race</b>                       |                   |                    |                      |
| White                             | 57.8              | 59.5               | 56.0                 |
| Black or African American         | 21.1              | 18.9               | 23.6                 |
| American Indian or Alaska Native  | 0.7               | 0.6                | 0.8                  |
| Asian                             | 3.8               | 3.8                | 3.8                  |
| Native Hawaiian or Other Pacific  |                   |                    |                      |
| Islander                          | 0.4               | 0.4                | 0.4                  |
| Unknown                           | 16.2              | 16.9               | 15.4                 |
| <b>Ethnicity</b>                  |                   |                    |                      |
| Hispanic                          | 12.4              | 12.9               | 11.9                 |
| <b>Month of Index</b>             |                   |                    |                      |
| February, 2020                    | 1.8               | 1.0                | 0.6                  |
| March, 2020                       | 6.8               | 7.1                | 6.2                  |
| April, 2020                       | 10.8              | 11.8               | 10.7                 |
| May, 2020                         | 7.0               | 7.6                | 7.3                  |
| June, 2020                        | 7.4               | 8.1                | 8.0                  |
| Jul, 2020                         | 10.8              | 11.0               | 11.7                 |
| August, 2020                      | 6.7               | 6.0                | 6.7                  |
| September, 2020                   | 5.6               | 4.8                | 5.2                  |
| October, 2020                     | 8.5               | 8.4                | 8.5                  |
| November, 2020                    | 15.1              | 16.0               | 16.8                 |
| December, 2020                    | 18.3              | 17.2               | 17.3                 |
| January, 2021                     | 1.0               | 1.1                | 1.1                  |
| <b>US Census division</b>         |                   |                    |                      |
| Midwest                           | 9.6               | 9.7                | 9.6                  |
| Northeast                         | 10.8              | 11.1               | 10.4                 |
| South                             | 44.0              | 42.1               | 45.8                 |
| West                              | 33.0              | 2.6                | 2.6                  |
| <b>Baseline Comorbidities</b>     |                   |                    |                      |
| <i>Gastrointestinal disorders</i> | 30.4              | 28.0               | 32.9                 |
| <i>Skin disorder</i>              | 13.8              | 13.3               | 14.3                 |
| Atopic dermatitis                 | 0.2               | 0.1                | 0.2                  |
| <i>Autoimmune disease</i>         |                   |                    |                      |
| Systemic lupus erythematosus      | 0.7               | 0.2                | 1.3                  |
| Rheumatoid arthritis              | 1.7               | 1.0                | 2.5                  |
| Psoriasis, including psoriatic    |                   |                    |                      |
| arthritis                         | 0.7               | 0.7                | 0.7                  |
| Inflammatory bowel disease        | 0.2               | 0.2                | 0.2                  |

|                                                                |      |      |      |
|----------------------------------------------------------------|------|------|------|
| Multiple sclerosis                                             | 0.5  | 0.3  | 0.8  |
| Glomerulonephritis                                             | 0.4  | 0.4  | 0.3  |
| Autoimmune thyroid disease                                     | 0.2  | 0.1  | 0.4  |
| <i>Cancer</i>                                                  | 9.2  | 9.5  | 8.9  |
| Solid Tumors                                                   | 7.0  | 6.9  | 7.0  |
| Breast                                                         | 1.2  | 0.0  | 2.4  |
| Prostate                                                       | 1.2  | 2.4  | 0.0  |
| Lung                                                           | 1.3  | 1.2  | 1.4  |
| Other                                                          | 4.8  | 4.8  | 4.8  |
| Hematologic malignancies                                       | 3.2  | 3.5  | 2.8  |
| Leukemia                                                       | 0.8  | 1.1  | 0.5  |
| Lymphoma                                                       | 0.7  | 0.9  | 0.6  |
| Multiple myeloma (MM)                                          | 0.4  | 0.4  | 0.3  |
| Other                                                          | 1.5  | 1.5  | 1.5  |
| <i>Cardiovascular disease</i>                                  | 53.4 | 55.6 | 51.1 |
| Coronary artery disease                                        | 13.5 | 16.6 | 10.2 |
| Peripheral vascular disease                                    | 4.7  | 5.6  | 3.8  |
| Cerebrovascular disease                                        | 3.8  | 3.8  | 3.8  |
| Hypertension                                                   | 49.5 | 51.1 | 47.8 |
| Congestive heart failure                                       | 12.5 | 13.6 | 11.4 |
| Atrial Fibrillation                                            | 10.7 | 12.5 | 8.8  |
| <i>Chronic kidney disease</i>                                  | 16.5 | 18.5 | 14.4 |
| Stage I                                                        | 0.2  | 0.2  | 0.2  |
| Stage II                                                       | 1.2  | 1.5  | 0.9  |
| Stage III                                                      | 5.7  | 6.0  | 5.3  |
| Stage IV                                                       | 2.3  | 2.4  | 2.2  |
| Stage V (end stage renal disease)                              | 3.8  | 4.4  | 3.1  |
| Unknown                                                        | 14.7 | 16.7 | 12.7 |
| <i>Chronic dialysis</i>                                        | 1.2  | 1.5  | 1.0  |
| Hemodialysis                                                   | 1.2  | 1.5  | 1.0  |
| Peritoneal dialysis                                            | 0.0  | 0.0  | 0.0  |
| <i>Chronic lung disease</i>                                    | 19.5 | 17.7 | 21.4 |
| Asthma                                                         | 8.3  | 5.5  | 11.4 |
| Chronic obstructive pulmonary disease                          | 12.4 | 12.8 | 11.9 |
| Pulmonary fibrosis                                             | 1.3  | 1.5  | 1.1  |
| <i>Diabetes mellitus</i>                                       |      |      |      |
| Type I                                                         | 1.6  | 1.8  | 1.5  |
| Type II, diabetic                                              | 29.7 | 31.1 | 28.2 |
| Diabetes mellitus, unknown                                     | 2.3  | 2.6  | 2.1  |
| <i>Human immunodeficiency virus</i>                            | 1.7  | 2.3  | 1.1  |
| <i>Liver disease</i>                                           | 3.0  | 3.5  | 2.5  |
| Chronic hepatitis                                              | 0.8  | 1.0  | 0.6  |
| Cirrhosis                                                      | 2.4  | 2.8  | 1.9  |
| Non-alcoholic steatohepatitis                                  | 0.5  | 0.5  | 0.6  |
| <i>Major movement or cognitive disorder (excluding stroke)</i> | 9.3  | 9.4  | 9.1  |
| <i>Obstructive sleep apnea</i>                                 | 7.6  | 8.5  | 6.7  |

---

|                                                        |     |     |     |
|--------------------------------------------------------|-----|-----|-----|
| <i>Hospitalization with infection in the past year</i> | 9.5 | 9.6 | 9.4 |
| <i>Transplant history</i>                              | 0.4 | 0.4 | 0.3 |

---

eTable 12: Selected Outcomes Percentage of US Adult Hospitalized COVID-19 Patients – Probable

| Category              | ICU Admission |        | ARDS/Respiratory Failure |        | IMV    |        | All-Cause Mortality |        |
|-----------------------|---------------|--------|--------------------------|--------|--------|--------|---------------------|--------|
|                       | N             | %      | N                        | %      | N      | %      | N                   | %      |
| <b>Gender</b>         |               |        |                          |        |        |        |                     |        |
| Male                  | 14,553        | 18.59% | 13,614                   | 47.34% | 14,553 | 15.64% | 14,553              | 7.79%  |
| Female                | 13,647        | 14.40% | 12,724                   | 39.34% | 13,647 | 11.64% | 13,647              | 5.84%  |
| <b>Age</b>            |               |        |                          |        |        |        |                     |        |
| 18-34                 | 2,928         | 10.62% | 2,829                    | 25.49% | 2,928  | 7.79%  | 2,928               | 1.64%  |
| 35-49                 | 5,090         | 13.95% | 4,887                    | 38.02% | 5,090  | 11.20% | 5,090               | 2.99%  |
| 50-64                 | 8,669         | 17.94% | 8,084                    | 46.96% | 8,669  | 15.49% | 8,669               | 5.29%  |
| 65+                   | 11,513        | 18.19% | 10,538                   | 48.16% | 11,513 | 14.97% | 11,513              | 11.05% |
| <b>Time Period</b>    |               |        |                          |        |        |        |                     |        |
| Feb-20,Mar-20,Apr-20  | 5,468         | 27.82% | 4,946                    | 49.66% | 5,468  | 23.30% | 5,468               | 8.96%  |
| May-20,Jun-20,Jul-20  | 7,104         | 14.65% | 6,716                    | 39.13% | 7,104  | 13.02% | 7,104               | 6.24%  |
| Aug-20,Sept-20,Oct-20 | 5,878         | 13.13% | 5,517                    | 41.67% | 5,878  | 10.99% | 5,878               | 6.14%  |
| Nov-20,Dec-20,Jan-21  | 9,700         | 13.56% | 9,119                    | 44.31% | 9,700  | 10.33% | 9,700               | 6.56%  |



### S5 Figure. The Forest Plots of Model-adjusted Hazard Ratios among US Hospitalized Adult Patients with COVID-19 by Gender, by Age Group, and by Time Period – Probable Cohort

#### A) Gender

| Characteristics                  | Adjusted HR (95% CI) | Pr > ChiSq |
|----------------------------------|----------------------|------------|
| <b>Male (Reference : Female)</b> |                      |            |
| ICU Admission                    | 1.27 (1.20-1.35)     | <.0001     |
| IMV                              | 1.27 (1.19-1.36)     | <.0001     |
| ARDS/Respiratory Failure         | 1.19 (1.16-1.23)     | <.0001     |
| All-cause Mortality              | 1.15 (1.05-1.26)     | 0.0026     |

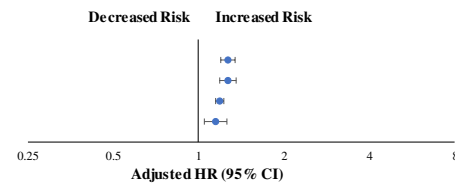

#### B) Age

| Characteristics                 | Adjusted HR (95% CI) | Pr > ChiSq |
|---------------------------------|----------------------|------------|
| <b>ICU Admission</b>            |                      |            |
| 18-34                           | 1 (ref)              |            |
| 35-49                           | 1.22 (1.07-1.39)     | 0.0036     |
| 50-64                           | 1.45 (1.29-1.64)     | <.0001     |
| 65+                             | 1.40 (1.24-1.58)     | <.0001     |
| <b>IMV</b>                      |                      |            |
| 18-34                           | 1 (ref)              |            |
| 35-49                           | 1.27 (1.09-1.48)     | 0.0026     |
| 50-64                           | 1.63 (1.41-1.88)     | <.0001     |
| 65+                             | 1.38 (1.19-1.60)     | <.0001     |
| <b>ARDS/Respiratory Failure</b> |                      |            |
| 18-34                           | 1 (ref)              |            |
| 35-49                           | 1.42 (1.32-1.54)     | <.0001     |
| 50-64                           | 1.64 (1.53-1.77)     | <.0001     |
| 65+                             | 1.57 (1.45-1.69)     | <.0001     |
| <b>All-cause Mortality</b>      |                      |            |
| 18-34                           | 1 (ref)              |            |
| 35-49                           | 1.43 (1.03-1.98)     | 0.0313     |
| 50-64                           | 1.99 (1.47-2.69)     | <.0001     |
| 65+                             | 3.72 (2.77-4.99)     | <.0001     |

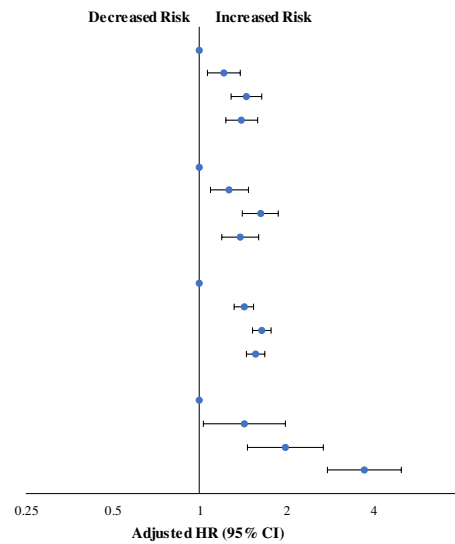

#### C) Time Period

| Characteristics                 | Adjusted HR (95% CI) | Pr > ChiSq |
|---------------------------------|----------------------|------------|
| <b>ICU Admission</b>            |                      |            |
| Feb, 2020 - Apr, 2020           | 1 (ref)              |            |
| May, 2020 - Jul, 2020           | 0.55 (0.51-0.60)     | <.0001     |
| Aug, 2020 - Oct, 2020           | 0.49 (0.45-0.53)     | <.0001     |
| Nov, 2020 - Jan, 2021           | 0.50 (0.46-0.54)     | <.0001     |
| <b>IMV</b>                      |                      |            |
| Feb, 2020 - Apr, 2020           | 1 (ref)              |            |
| May, 2020 - Jul, 2020           | 0.50 (0.46-0.54)     | <.0001     |
| Aug, 2020 - Oct, 2020           | 0.41 (0.37-0.45)     | <.0001     |
| Nov, 2020 - Jan, 2021           | 0.38 (0.35-0.41)     | <.0001     |
| <b>ARDS/Respiratory Failure</b> |                      |            |
| Feb, 2020 - Apr, 2020           | 1 (ref)              |            |
| May, 2020 - Jul, 2020           | 0.72 (0.69-0.76)     | <.0001     |
| Aug, 2020 - Oct, 2020           | 0.75 (0.71-0.79)     | <.0001     |
| Nov, 2020 - Jan, 2021           | 0.79 (0.76-0.83)     | <.0001     |
| <b>All-cause Mortality</b>      |                      |            |
| Feb, 2020 - Apr, 2020           | 1 (ref)              |            |
| May, 2020 - Jul, 2020           | 0.72 (0.63-0.82)     | <.0001     |
| Aug, 2020 - Oct, 2020           | 0.73 (0.63-0.84)     | <.0001     |
| Nov, 2020 - Jan, 2021           | 0.78 (0.69-0.88)     | <.0001     |

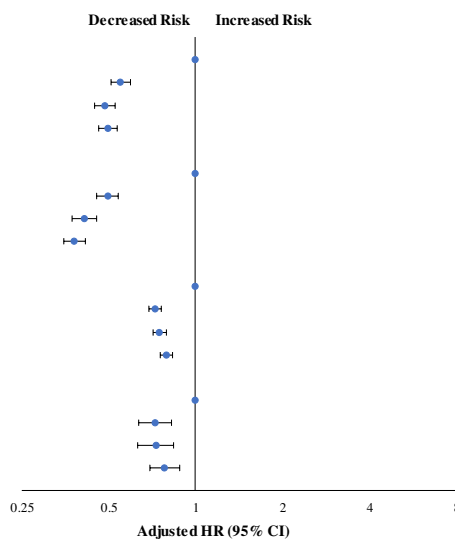

HR: the abbreviation of Hazard Ratio; ARDS: the abbreviation of acute respiratory distress syndrome; ICU: the abbreviation of intensive care unit; IMV: the abbreviation of invasive mechanical ventilation. Three separate Fine and Gray models were developed stratified by age group, gender, and time period; each model used the other two main categories of risk exposure (for example, gender and time period in the age group model) as covariates. The other covariates in each model were race, ethnicity, US region, hypertension, diabetes (Type I and II), active cancer, coronary artery disease, congestive heart failure, chronic kidney disease, chronic obstructive pulmonary disease (COPD), asthma, and obstructive sleep apnea.

S6 Figure. Model-adjusted Cumulative Incidence of Selected Outcomes among US Hospitalized Adult Patients with COVID-19 by Gender, by Age Group, and by Time Period – Probable Cohort

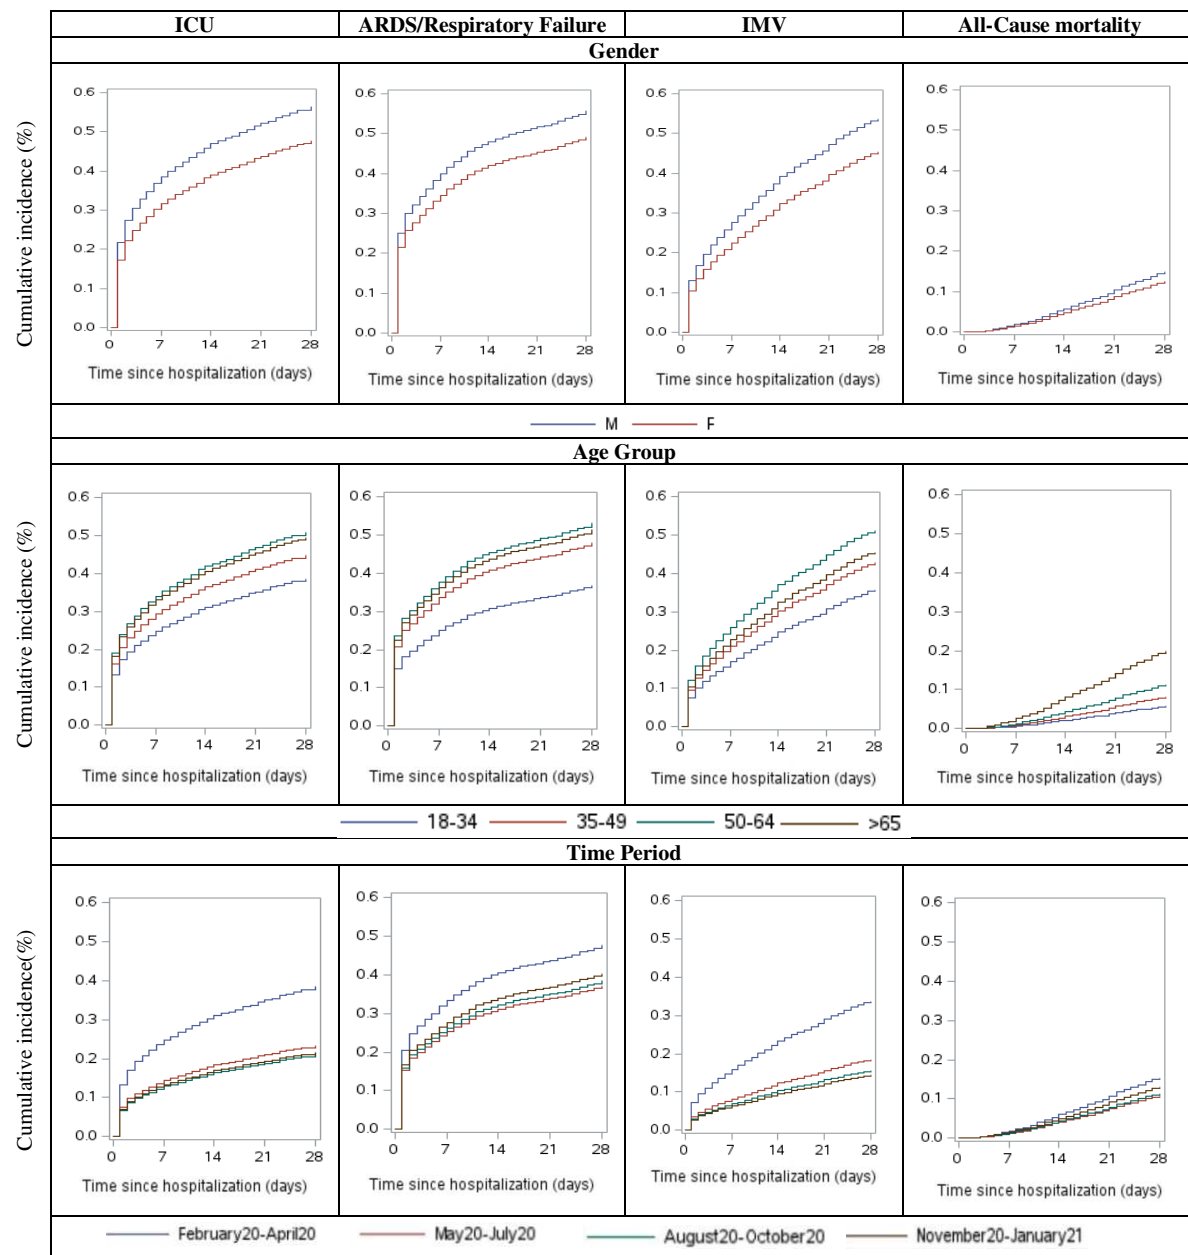

HR: the abbreviation of Hazard Ratio; ARDS: the abbreviation of acute respiratory distress syndrome; ICU: the abbreviation of intensive care unit; IMV: the abbreviation of invasive mechanical ventilation. Three separate Fine and Gray models were developed stratified by age group, gender, and time period; each model used the other two main categories of risk exposure (for example, gender and time period in the age group model) as covariates. The other covariates in each model were race, ethnicity, US region, hypertension, diabetes (Type I and II), active cancer, coronary artery disease, congestive heart failure, chronic kidney disease, chronic obstructive pulmonary disease (COPD), asthma, and obstructive sleep apnea.
